# Supplementary material
Source: PubMed Central journal article supplement (PMC6644078)
Supplement: ao6b00233_si_001.pdf [file ao6b00233_si_001.pdf]

**Supporting Information for “Microwave Heating of Synthetic Skin for Potential Treatment of Gout using the Metal-Assisted and Microwave-Accelerated Decrystallization Technique”**

Salih Toker<sup>1</sup>, Zainab Boone-Kukoyi<sup>1</sup>, Nishone Thompson<sup>1</sup>, Hillary Ajifa<sup>1</sup>, Travis Clement<sup>1</sup>,  
Birol Ozturk<sup>2</sup>, and Kadir Aslan<sup>\*,1</sup>

<sup>1</sup> Morgan State University, Department of Chemistry, 1700 East Cold Spring Lane,  
Baltimore MD 21215

<sup>2</sup> Morgan State University, Department of Physics, 1700 East Cold Spring Lane, Baltimore  
MD 2121

\* Corresponding Author: Telephone: 1 443 885 4257, E-mail: [Kadir.Aslan@morgan.edu](mailto:Kadir.Aslan@morgan.edu)

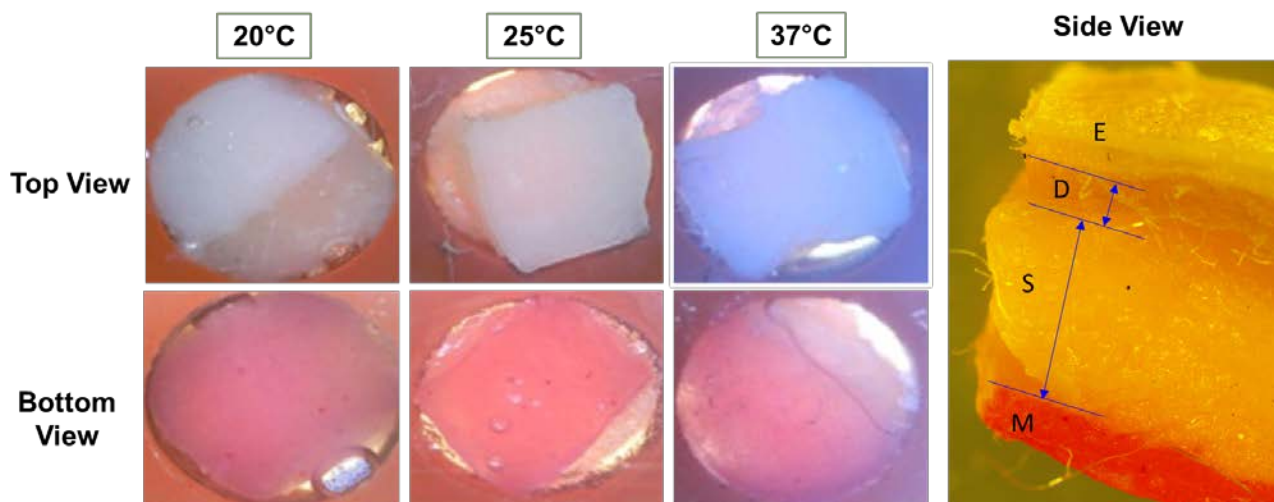

**Figure S1.** Synthetic skin control samples prior to their exposure to 8 GHz medical microwaves at 20°C, 25°C and 37°C. The upper view represents the top of well and lower view represents the bottom of the well. Side view of synthetic skin construct taken with a stereomicroscope, which shows the individual layers of the skin construct.

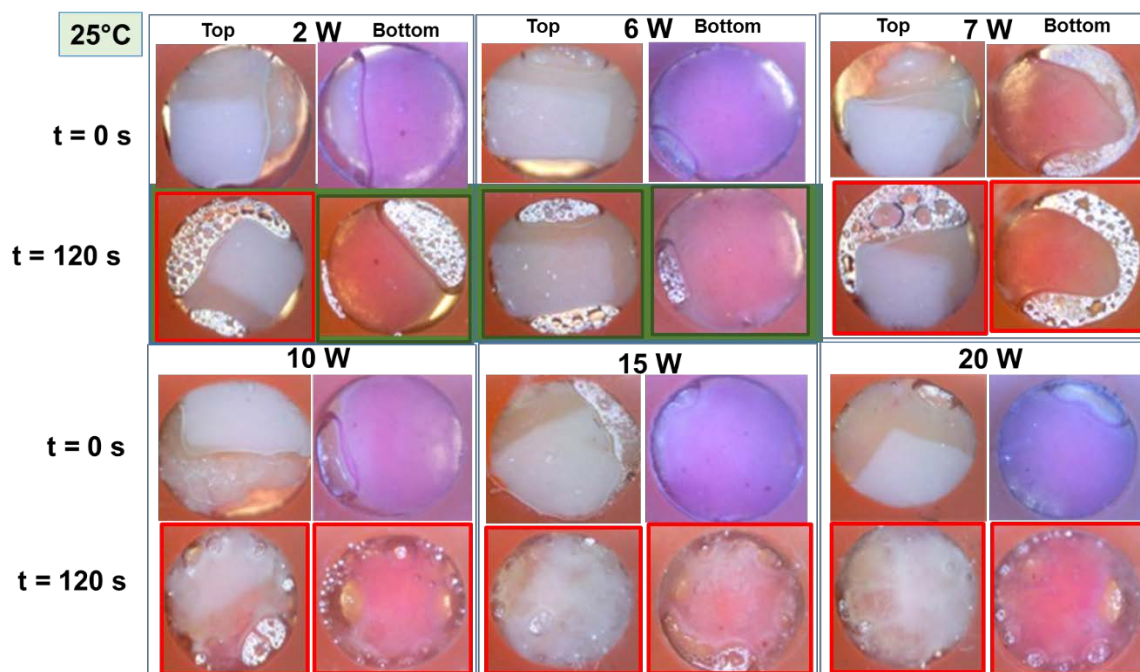

**Figure S2. Qualitative assessment of skin damage via visual confirmation.** Real-color pictures of synthetic skin samples below room temperature (assessed up to 120 s at 25°C initial temperature at t = 0 s) before and during microwave heating at 2 W, 4 W, 5 W, 10 W, 15 W and 20 W. Green frames denotes no tissue damage at 2 W and 4 W. Red frames denote tissue damage after 120 s of microwave heating at 5 W, 10 W, 15 W and 20 W.

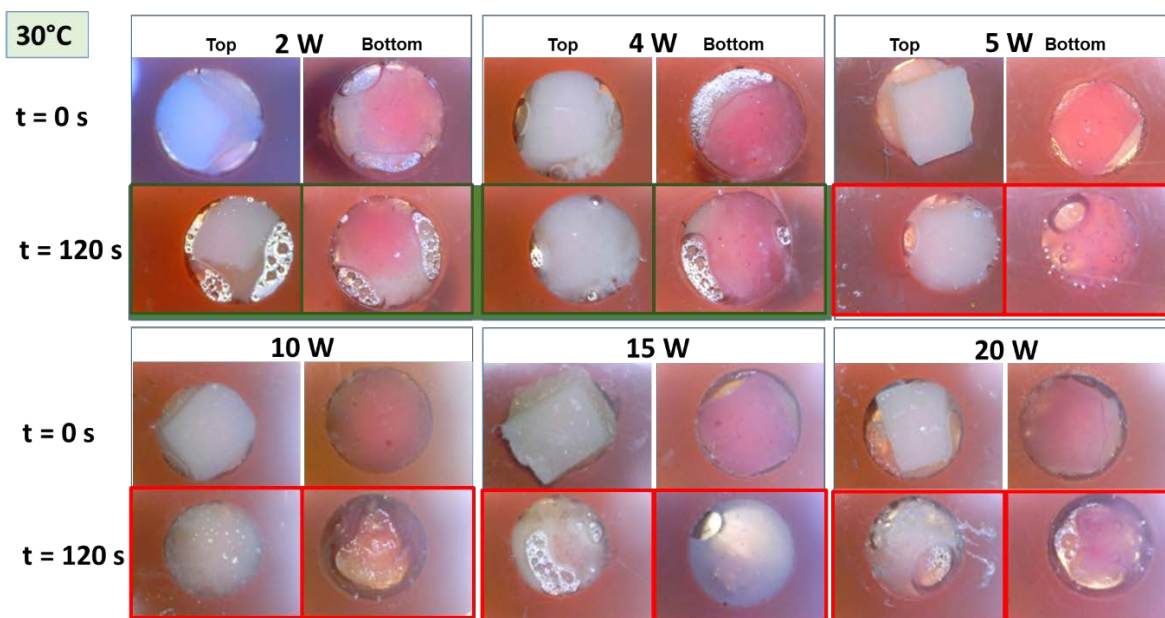

**Figure S3. Qualitative assessment of skin damage via visual confirmation.** Real-color pictures of synthetic skin samples below room temperature (assessed up to 120 s at 30°C initial temperature at t = 0 s) before and during microwave heating at 2 W, 4 W, 5 W, 10 W, 15 W and 20 W. Green frames denotes no tissue damage at 2 W and 4 W. Red frames denote tissue damage after 120 s of microwave heating at 5 W, 10 W, 15 W and 20 W.

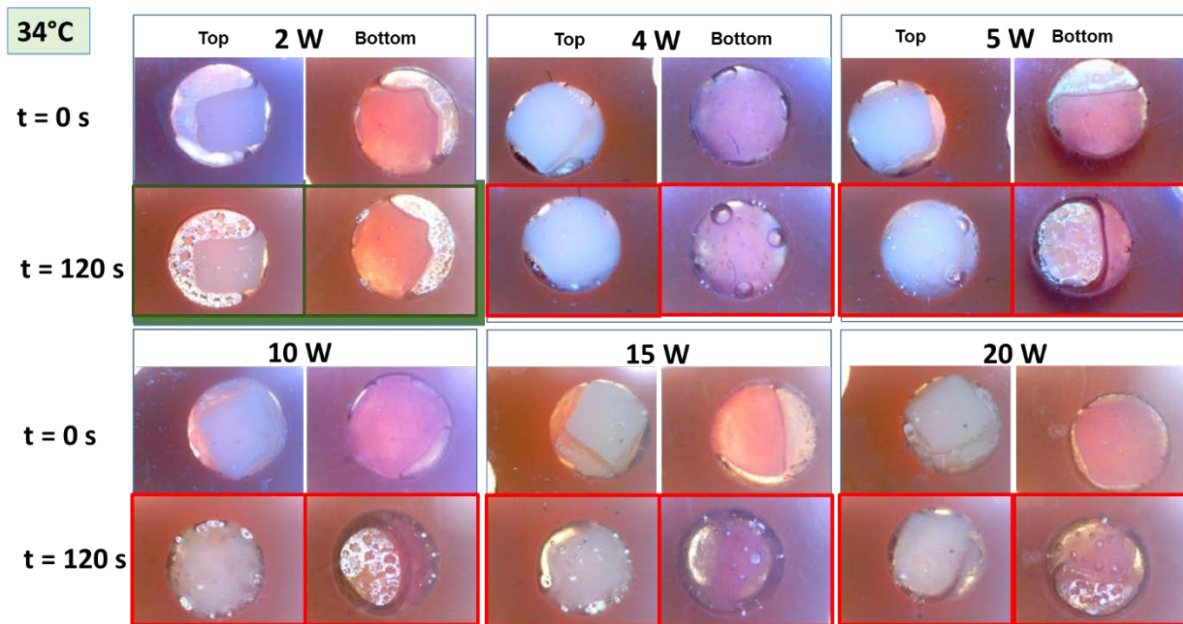

**Figure S4. Qualitative assessment of skin damage via visual confirmation.** Real-color pictures of synthetic skin samples below room temperature (assessed up to 120 s at 34°C initial temperature at  $t = 0$  s) before and during microwave heating at 2 W, 4 W, 5 W, 10 W, 15 W and 20 W. Green frames denotes no tissue damage at 2 W and 4 W. Red frames denote tissue damage after 120 seconds of microwave heating at 5 W, 10 W, 15 W and 20 W.

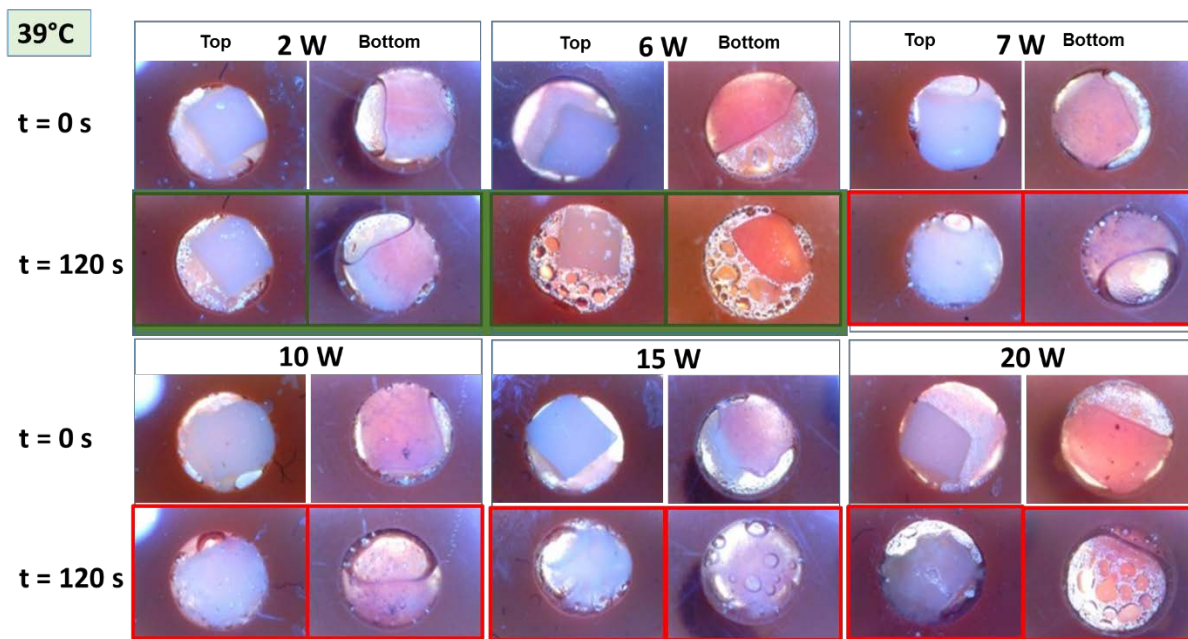

**Figure S5. Qualitative assessment of skin damage via visual confirmation.** Real-color pictures of synthetic skin samples below room temperature (assessed up to 120 seconds at 34°C initial temperature at  $t = 0$  sec) before and during microwave heating at 2 W, 4 W, 5 W, 10 W, 15 W and 20 W. Green frames denotes no tissue damage at 2 W and 4 W. Red frames denote tissue damage after 120 seconds of microwave heating at 5 W, 10 W, 15W and 20 W.



Synthetic skin samples ,  $T_i = 20^\circ\text{C}$

| Microwave Heating Time | Microwave Power |        |     |        |     |        |     |        |      |        |      |        |      |        |
|------------------------|-----------------|--------|-----|--------|-----|--------|-----|--------|------|--------|------|--------|------|--------|
|                        | 2 W             |        | 3 W |        | 4 W |        | 5 W |        | 10 W |        | 15 W |        | 20 W |        |
|                        | Top             | Bottom | Top | Bottom | Top | Bottom | Top | Bottom | Top  | Bottom | Top  | Bottom | Top  | Bottom |
| 0 s                    |                 |        |     |        |     |        |     |        |      |        |      |        |      |        |
| 20 s                   |                 |        |     |        |     |        |     |        |      |        |      |        |      |        |
| 40 s                   |                 |        |     |        |     |        |     |        |      |        |      |        |      |        |
| 60 s                   |                 |        |     |        |     |        |     |        |      |        |      |        |      |        |
| 80 s                   |                 |        |     |        |     |        |     |        |      |        |      |        |      |        |
| 100 s                  |                 |        |     |        |     |        |     |        |      |        |      |        |      |        |
| 120 s                  |                 |        |     |        |     |        |     |        |      |        |      |        |      |        |

**Figure S6.** Synthetic skin samples during exposure to 8 GHz medical microwaves at  $20^\circ\text{C}$ .

Synthetic skin samples ,  $T_i = 25^\circ\text{C}$

| Microwave Heating Time | Microwave Power |        |     |        |     |        |     |        |     |        |     |        |      |        |      |        |      |        |
|------------------------|-----------------|--------|-----|--------|-----|--------|-----|--------|-----|--------|-----|--------|------|--------|------|--------|------|--------|
|                        | 2 W             |        | 5 W |        | 6 W |        | 7W  |        | 8 W |        | 9 W |        | 10 W |        | 15 W |        | 20 W |        |
|                        | Top             | Bottom | Top | Bottom | Top | Bottom | Top | Bottom | Top | Bottom | Top | Bottom | Top  | Bottom | Top  | Bottom | Top  | Bottom |
| 0 s                    |                 |        |     |        |     |        |     |        |     |        |     |        |      |        |      |        |      |        |
| 20 s                   |                 |        |     |        |     |        |     |        |     |        |     |        |      |        |      |        |      |        |
| 40 s                   |                 |        |     |        |     |        |     |        |     |        |     |        |      |        |      |        |      |        |
| 60 s                   |                 |        |     |        |     |        |     |        |     |        |     |        |      |        |      |        |      |        |
| 80 s                   |                 |        |     |        |     |        |     |        |     |        |     |        |      |        |      |        |      |        |
| 100 s                  |                 |        |     |        |     |        |     |        |     |        |     |        |      |        |      |        |      |        |
| 120 s                  |                 |        |     |        |     |        |     |        |     |        |     |        |      |        |      |        |      |        |

**Figure S7.** Synthetic skin samples during exposure to 8 GHz medical microwaves at  $25^\circ\text{C}$ .

### Synthetic skin samples , $T_i = 30^\circ\text{C}$

| Microwave Heating Time | Microwave Power |        |     |        |     |        |     |        |      |        |      |        |      |        |
|------------------------|-----------------|--------|-----|--------|-----|--------|-----|--------|------|--------|------|--------|------|--------|
|                        | 2 W             |        | 3 W |        | 4 W |        | 5 W |        | 10 W |        | 15 W |        | 20 W |        |
|                        | Top             | Bottom | Top | Bottom | Top | Bottom | Top | Bottom | Top  | Bottom | Top  | Bottom | Top  | Bottom |
| 0 s                    |                 |        |     |        |     |        |     |        |      |        |      |        |      |        |
| 20 s                   |                 |        |     |        |     |        |     |        |      |        |      |        |      |        |
| 40 s                   |                 |        |     |        |     |        |     |        |      |        |      |        |      |        |
| 60 s                   |                 |        |     |        |     |        |     |        |      |        |      |        |      |        |
| 80 s                   |                 |        |     |        |     |        |     |        |      |        |      |        |      |        |
| 100 s                  |                 |        |     |        |     |        |     |        |      |        |      |        |      |        |
| 120 s                  |                 |        |     |        |     |        |     |        |      |        |      |        |      |        |

**Figure S8.** Synthetic skin samples during exposure to 8 GHz medical microwaves at  $30^\circ\text{C}$

### Synthetic skin samples , $T_i = 34^\circ\text{C}$

| Microwave Heating Time | Microwave Power |        |     |        |     |        |     |        |      |        |      |        |      |        |
|------------------------|-----------------|--------|-----|--------|-----|--------|-----|--------|------|--------|------|--------|------|--------|
|                        | 2 W             |        | 3 W |        | 4 W |        | 5 W |        | 10 W |        | 15 W |        | 20 W |        |
|                        | Top             | Bottom | Top | Bottom | Top | Bottom | Top | Bottom | Top  | Bottom | Top  | Bottom | Top  | Bottom |
| 0 s                    |                 |        |     |        |     |        |     |        |      |        |      |        |      |        |
| 20 s                   |                 |        |     |        |     |        |     |        |      |        |      |        |      |        |
| 40 s                   |                 |        |     |        |     |        |     |        |      |        |      |        |      |        |
| 60 s                   |                 |        |     |        |     |        |     |        |      |        |      |        |      |        |
| 80 s                   |                 |        |     |        |     |        |     |        |      |        |      |        |      |        |
| 100 s                  |                 |        |     |        |     |        |     |        |      |        |      |        |      |        |
| 120 s                  |                 |        |     |        |     |        |     |        |      |        |      |        |      |        |

**Figure S9.** Synthetic skin samples during exposure to 8 GHz medical microwaves at  $34^\circ\text{C}$



Synthetic skin samples ,  $T_i = 37^\circ\text{C}$

| Microwave Heating Time | Microwave Power |        |     |        |     |        |     |        |      |        |      |        |      |        |
|------------------------|-----------------|--------|-----|--------|-----|--------|-----|--------|------|--------|------|--------|------|--------|
|                        | 2 W             |        | 3 W |        | 4 W |        | 5 W |        | 10 W |        | 15 W |        | 20 W |        |
|                        | Top             | Bottom | Top | Bottom | Top | Bottom | Top | Bottom | Top  | Bottom | Top  | Bottom | Top  | Bottom |
| 0 s                    |                 |        |     |        |     |        |     |        |      |        |      |        |      |        |
| 20 s                   |                 |        |     |        |     |        |     |        |      |        |      |        |      |        |
| 40 s                   |                 |        |     |        |     |        |     |        |      |        |      |        |      |        |
| 60 s                   |                 |        |     |        |     |        |     |        |      |        |      |        |      |        |
| 80 s                   |                 |        |     |        |     |        |     |        |      |        |      |        |      |        |
| 100 s                  |                 |        |     |        |     |        |     |        |      |        |      |        |      |        |
| 120 s                  |                 |        |     |        |     |        |     |        |      |        |      |        |      |        |

**Figure S10.** Synthetic skin samples during exposure to 8 GHz medical microwaves at  $37^\circ\text{C}$ .

Synthetic skin samples ,  $T_i = 39^\circ\text{C}$

| Microwave Heating Time | Microwave Power |        |     |        |     |        |     |        |     |        |     |        |      |        |      |        |      |        |
|------------------------|-----------------|--------|-----|--------|-----|--------|-----|--------|-----|--------|-----|--------|------|--------|------|--------|------|--------|
|                        | 2 W             |        | 5 W |        | 6 W |        | 7W  |        | 8 W |        | 9 W |        | 10 W |        | 15 W |        | 20 W |        |
|                        | Top             | Bottom | Top | Bottom | Top | Bottom | Top | Bottom | Top | Bottom | Top | Bottom | Top  | Bottom | Top  | Bottom | Top  | Bottom |
| 0 s                    |                 |        |     |        |     |        |     |        |     |        |     |        |      |        |      |        |      |        |
| 20 s                   |                 |        |     |        |     |        |     |        |     |        |     |        |      |        |      |        |      |        |
| 40 s                   |                 |        |     |        |     |        |     |        |     |        |     |        |      |        |      |        |      |        |
| 60 s                   |                 |        |     |        |     |        |     |        |     |        |     |        |      |        |      |        |      |        |
| 80 s                   |                 |        |     |        |     |        |     |        |     |        |     |        |      |        |      |        |      |        |
| 100 s                  |                 |        |     |        |     |        |     |        |     |        |     |        |      |        |      |        |      |        |
| 120 s                  |                 |        |     |        |     |        |     |        |     |        |     |        |      |        |      |        |      |        |

**Figure S11.** Synthetic skin samples during exposure to 8 GHz medical microwaves at  $39^\circ\text{C}$ .

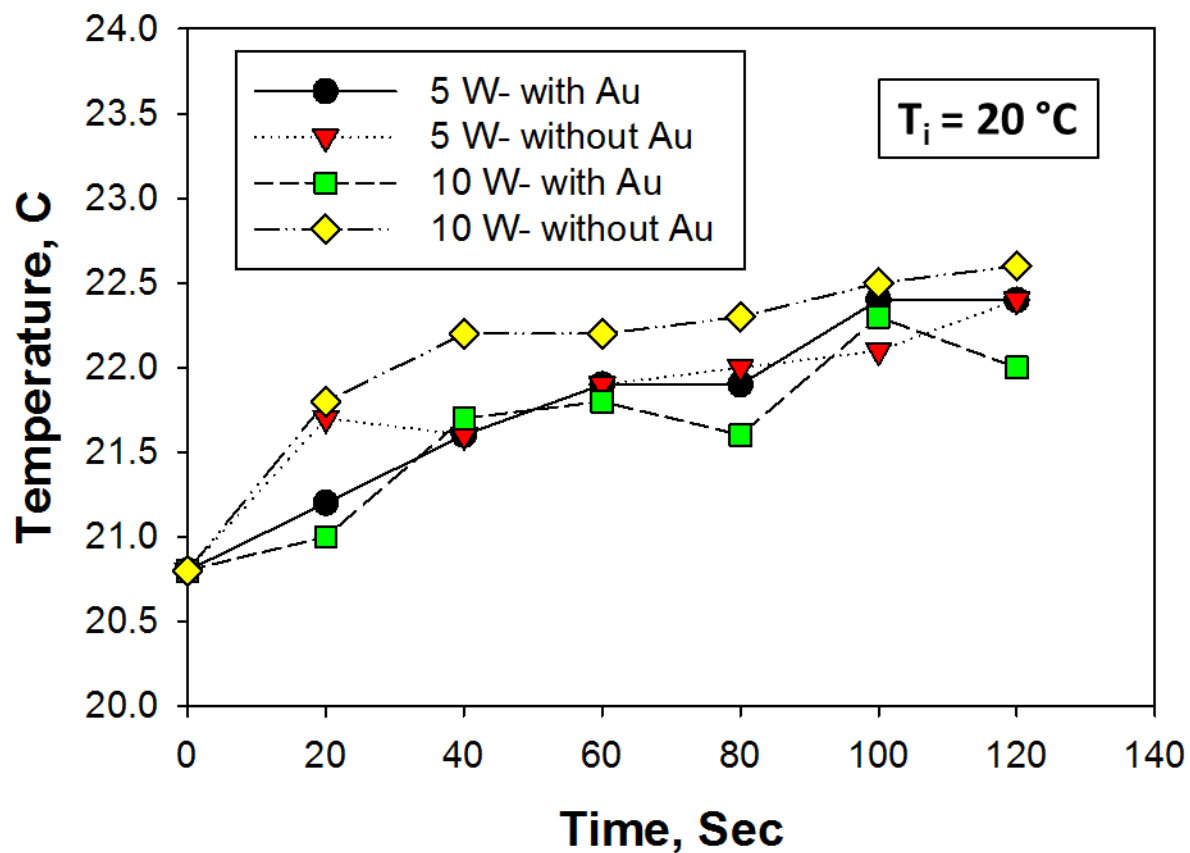

**Figure S12. Quantitative assessment of temperature change in skin only and skin with AuNPs (*In vitro*).** Inclusion of gold nanoparticles within synthetic skin samples results in lower temperature increase as compared to synthetic skin samples without gold nanoparticles.

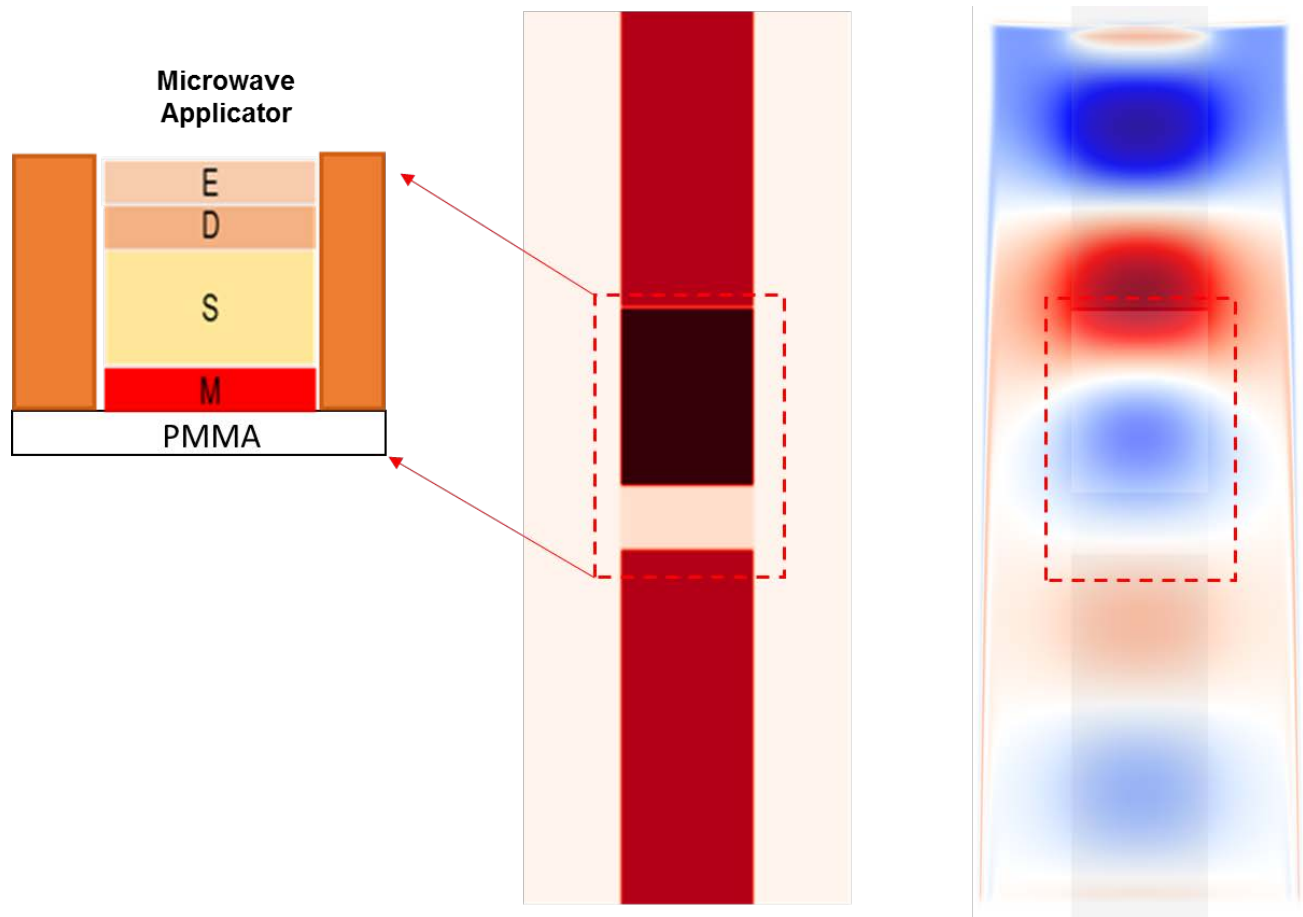

**Figure S13.** Simulations of electric field distributions for a 8 GHz microwave source in a waveguide with synthetic skin samples placed on between a cover slip and iCrystal plates.
